# Supplementary material for: Eating Healthy, Growing Healthy: Outcome Evaluation of the Nutrition Education Program Optimizing the Nutritional Value of Preschool Menus, Poland
Source: MDPI journal article supplement (doi:10.3390/nu11102438), 2019-10-13
Supplement: s1 [file s1]

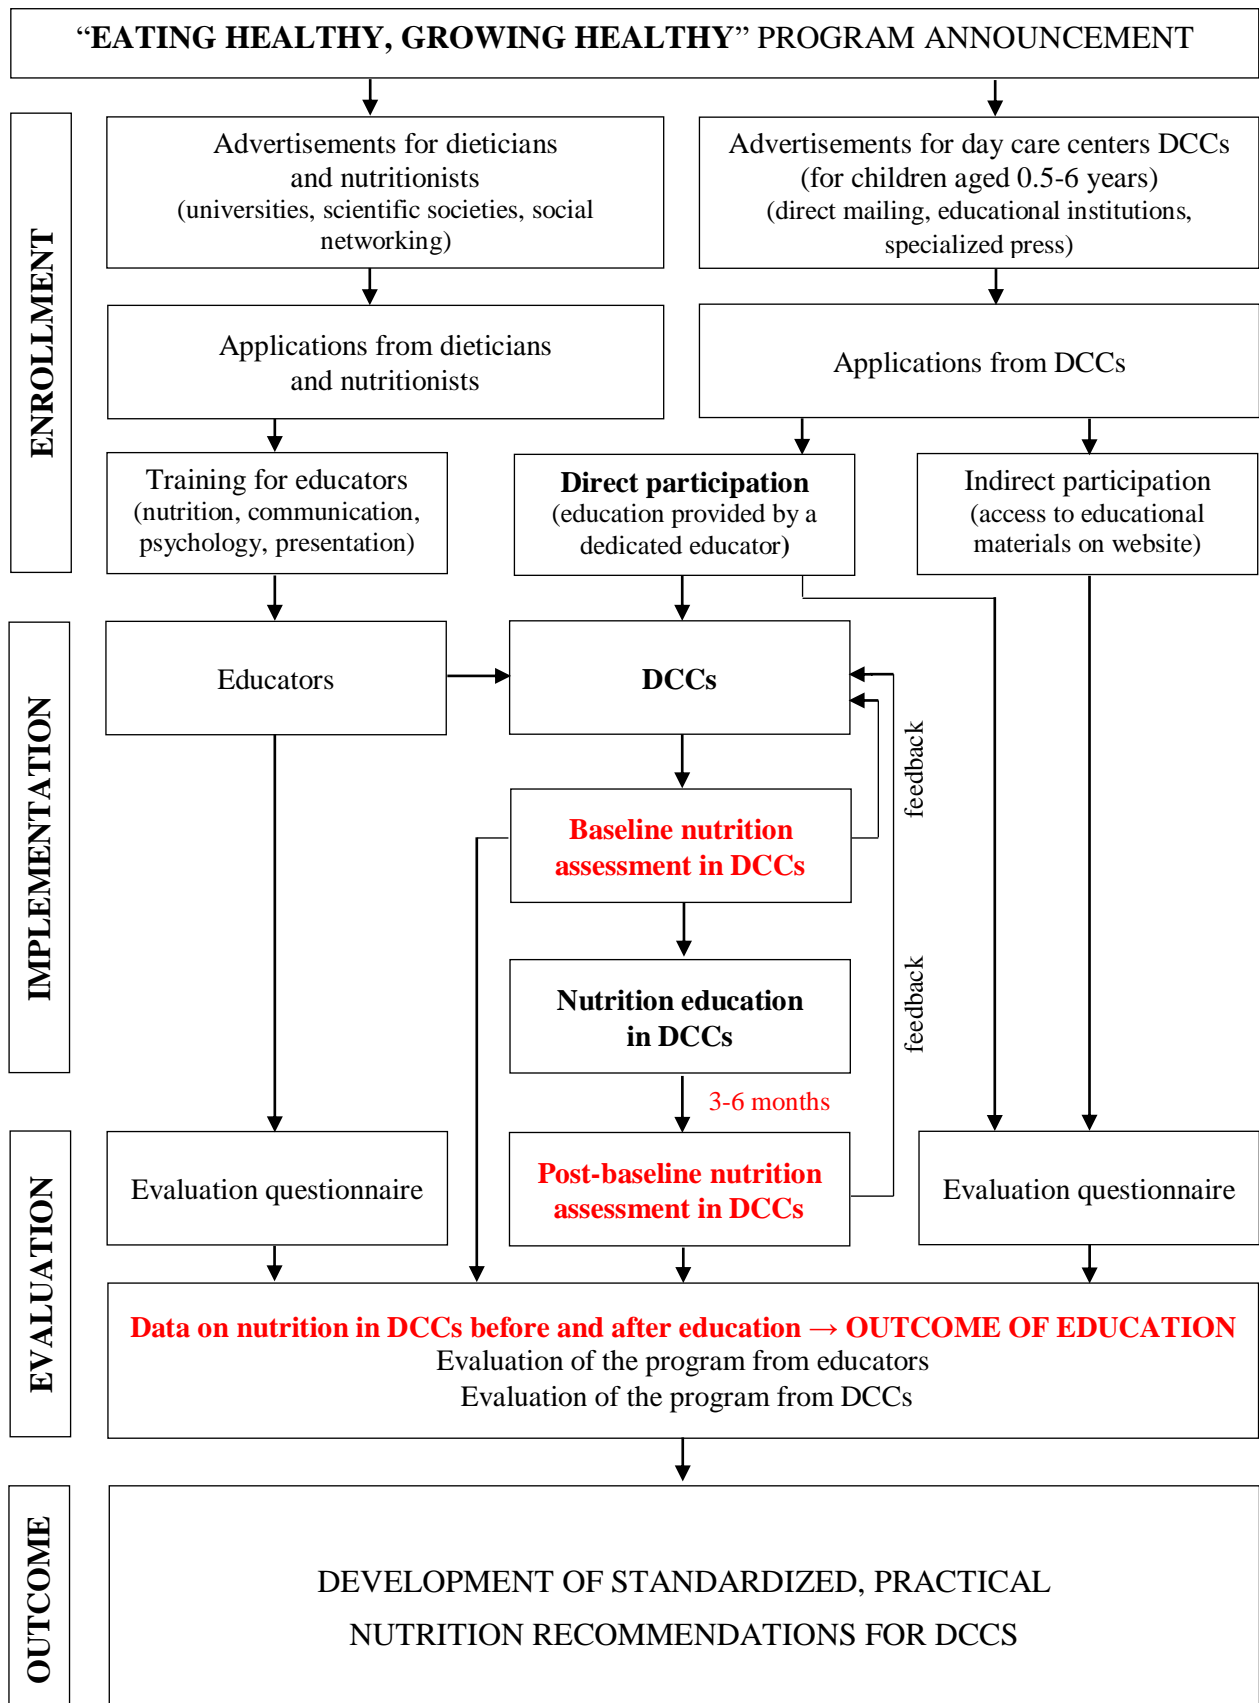

**Figure S1.** The overall scheme of the program Eating healthy, growing healthy (the part of the program presented in the manuscript is marked in red)

**Table S1.** The content of energy and nutrients presented as median and 25<sup>th</sup> and 75<sup>th</sup> percentiles (per a child a day) in 231 preschools' 10 day menus before (baseline) and after (post-baseline) the education program.

| Nutrient                     | Daily supply (per a child / day) |                         |
|------------------------------|----------------------------------|-------------------------|
|                              | Median (25th; 75th perc.)        |                         |
|                              | Baseline                         | Post-baseline           |
| Energy [kcal]                | 1243.1 (1102.2; 1394.2)          | 1210.9 (1067.7; 1351.5) |
| Protein [g]                  | 44.6 (39.5; 50.6)                | 44.2 (40.0; 50.6)       |
| Protein [% of energy]        | 14.5 (13.7; 15.5)                | 15.5 (14.1; 15.7)       |
| Animal protein [g]           | 27.3 (23.9; 31.6)                | 26.5 (23.8; 30.6)       |
| Vegetable protein [g]        | 17.3 (15.3; 19.8)                | 14.7 (14.1; 20.2)       |
| Fat [g]                      | 44.9 (39.1; 53.0)                | 43.7 (37.8; 50.2)       |
| Fat [% of energy]            | 33.1 (30.3; 35.5)                | 33.0 (30.3; 35.1)       |
| SFA [% of energy]            | 12.8 (11.6; 14.1)                | 12.9 (11.7; 13.9)       |
| MUFA [% of energy]           | 12.9 (11.6; 14.3)                | 12.7 (11.4; 14.0)       |
| PUFA [% of energy]           | 4.7 (4.1; 5.3)                   | 4.6 (4.1; 5.4)          |
| Cholesterol [mg]             | 165.5 (144.7; 189.8)             | 162.8 (143.3; 186.2)    |
| CHO [g]                      | 161.6 (140.0; 180.5)             | 157.8 (138.3; 177.4)    |
| CHO [% of energy]            | 51.9 (49.3; 54.5)                | 51.6 (49.7; 54.1)       |
| Sucrose [% of energy]        | 8.7 (7.0; 11.0)                  | 8.8 (6.5; 10.9)         |
| Lactose [g]                  | 10.5 (8.2; 13.0)                 | 10.8 (8.6; 13.0)        |
| Starch [g]                   | 93.0 (81.9; 106.1)               | 92.5 (80.1; 107.0)      |
| Dietary fiber [g]            | 15.5 (13.6; 18.3)                | 16.0 (13.6; 18.3)       |
| Vitamin A [μg]               | 1019.7 (750.0; 1285.5)           | 1023.9 (815.1; 1310.2)  |
| Retinol [μg]                 | 256.3 (212.7; 312.7)             | 249.8 (207.6; 310.5)    |
| Beta-carotene [μg]           | 4074.2 (3047.8; 5508.8)          | 4340.3 (3280.9; 5855.9) |
| Vitamin B <sub>1</sub> [mg]  | 0.9 (0.8; 1.0)                   | 0.9 (0.8; 1.0)          |
| Vitamin B <sub>2</sub> [mg]  | 1.1 (0.9; 1.2)                   | 1.1 (1.0; 1.2)          |
| Vitamin B <sub>6</sub> [mg]  | 1.5 (1.3; 1.7)                   | 1.5 (1.3; 1.7)          |
| Vitamin B <sub>12</sub> [μg] | 2.6 (2.2; 3.2)                   | 2.6 (2.1; 3.1)          |
| Vitamin C [mg]               | 98.4 (81.1; 117.4)               | 99.5 (83.2; 122.7)      |
| Vitamin D [μg]               | 1.7 (1.3; 2.1)                   | 1.6 (1.2; 2.0)          |
| Vitamin E [mg]               | 6.3 (5.2; 7.5)                   | 6.3 (5.2; 7.3)          |
| Folate [μg]                  | 214.1 (184.8; 249.1)             | 218.0 (185.5; 253.9)    |
| Niacin [mg]                  | 10.2 (8.9; 11.3)                 | 10.0 (8.7; 11.5)        |
| Calcium [mg]                 | 450.7 (373.5; 528.5)             | 457.9 (388.8; 535.0)    |
| Copper [mg]                  | 0.8 (0.7; 0.9)                   | 0.8 (0.7; 1.0)          |
| Iodine [μg]                  | 97.3 (69.2; 135.7)               | 96.8 (66.4; 133.7)      |
| Iron [mg]                    | 6.5 (5.7; 7.4)                   | 6.5 (5.8; 7.6)          |
| Magnesium [mg]               | 200.6 (175.9; 230.4)             | 202.8 (179.3; 232.0)    |
| Phosphorus [mg]              | 792.4 (705.6; 887.5)             | 786.5 (712.4; 900.8)    |
| Potassium [mg]               | 2439.3 (2119.1; 2769.2)          | 2381.9 (2107.1; 2764.2) |
| Sodium [mg]                  | 2046.6 (1567.0; 2720.4)          | 2046.0 (1439.5; 2632.0) |
| Zinc [mg]                    | 5.7 (5.1; 6.6)                   | 5.8 (5.3; 6.7)          |
